# Supplementary material
Source: PubMed Central journal article supplement (PMC7655319)
Supplement: 17-00822.pdf [file 17-00822.pdf]

## ON-LINE APPENDIX

### **Image Processing**

Coregistration and averaging of MP2RAGE images were performed using a custom pipeline developed in an open-source neuroimaging software environment (Neuroimaging in Python: Pipelines and Interfaces [NIPYPE]; <https://github.com/nipy/nipype>). Linear coregistration was performed using the Advanced Normalization Tools software package (<http://stnava.github.io/ANTs>) (downsampled registration using ANTs affine initializer with 6 *df* and a mutual information cost function).

### **Ex Vivo MR Imaging and Immunohistochemistry**

A brain from a patient with MS, not included in the in vivo study, was imaged postmortem at 7T with T2\*GRE and MP2RAGE (Online Table 3). Lesions were identified independently on each sequence and compared. Tissue at the locations of 4 lesions seen on

MP2RAGE was isolated and embedded in paraffin. Ten-micrometer sections were cut on a sliding microtome and mounted on 1 × 3 inch glass slides. Immunostaining was performed as previously described<sup>1</sup> using mouse anti-myelin proteolipid protein (1:200) (Abcam; <http://www.abcam.com/index.html>), visualized with diaminobenzidine, and counterstained with hematoxylin. All sections were imaged by using a Zeiss Axio-Observer Z1 microscope (<https://www.zeiss.com/microscopy/us/products/light-microscope/axio-observer-for-biology.html>).

## REFERENCE

1. Absinta M, Vuolo L, Rao A, et al. **Gadolinium-based MRI characterization of leptomeningeal inflammation in multiple sclerosis.** *Neurology* 2015;85:18–28 CrossRef Medline

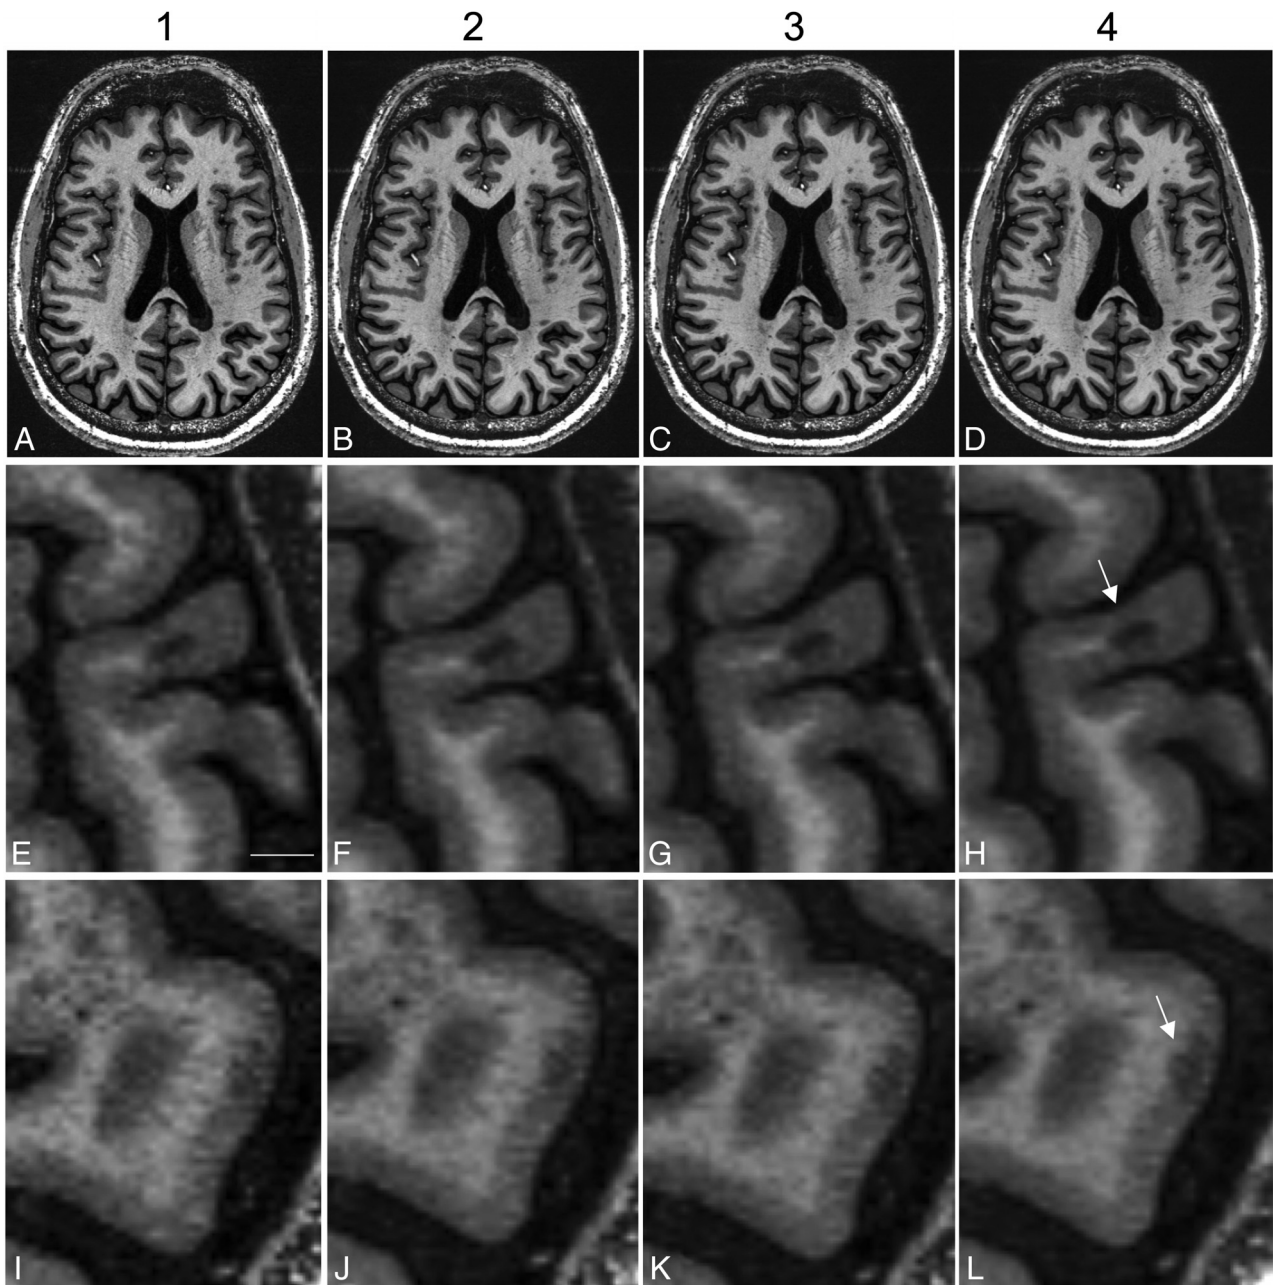

**ON-LINE FIG 1.** Comparison of different numbers of MP2RAGE repetitions. Image quality increases with increasing number of MP2RAGE repetitions (A, E, and I are a single repetition; B, F, and J are the median of 2 repetitions; C, G, and K are the median of 3 repetitions; and D, H, and L are the median of 4 repetitions). E–H, An example of a leukocortical lesion identified prospectively on all 4 images. I–L, An example of a leukocortical lesion predominantly involving the cortex identified prospectively only when 3 (K) or 4 (L) repetitions were averaged. Scale bar = 5 mm.

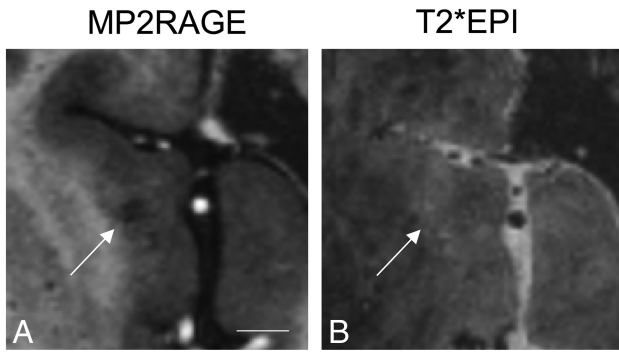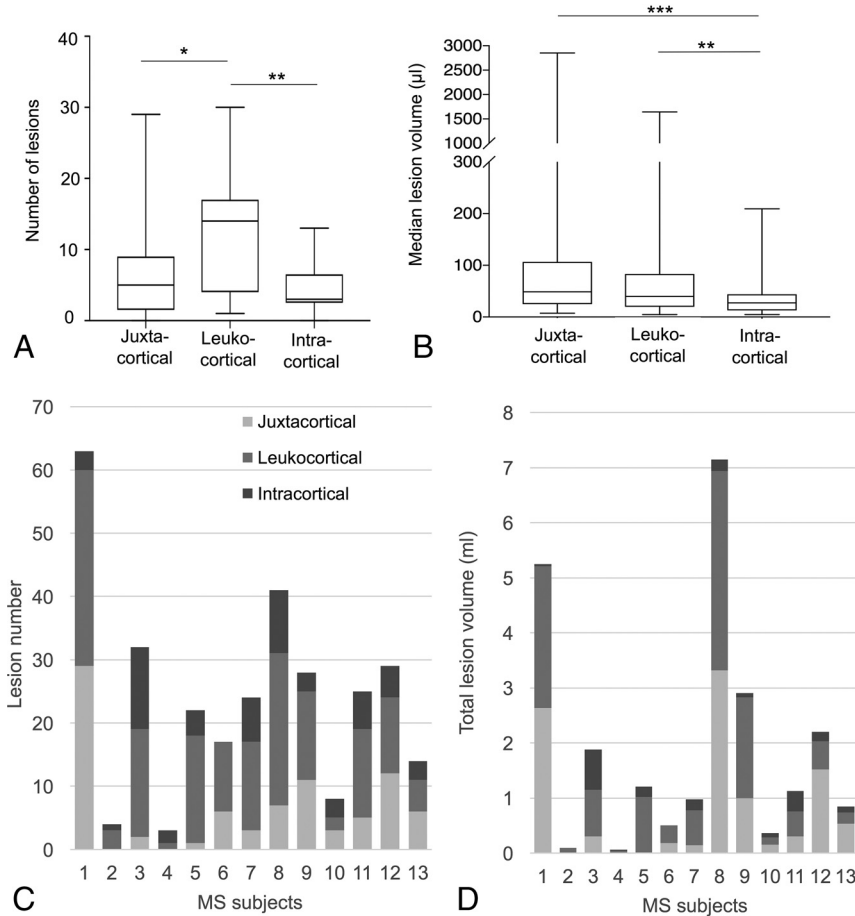

**ON-LINE FIG 3.** Cortical lesion number and volume distribution. *A*, There are more leukocortical than intracortical or juxtacortical lesions observed across all cases. *B*, Median juxtacortical lesion volume exceeds median leukocortical or intracortical volume; median leukocortical lesion volume also exceeds median intracortical volume. Total cortical lesion number (*C*) and volume (*D*) for the 3 lesion subtypes are highly variable across MS cases. Three asterisks indicate  $P < .001$ ; double asterisks,  $P < .01$ ; asterisk,  $P < .05$ .

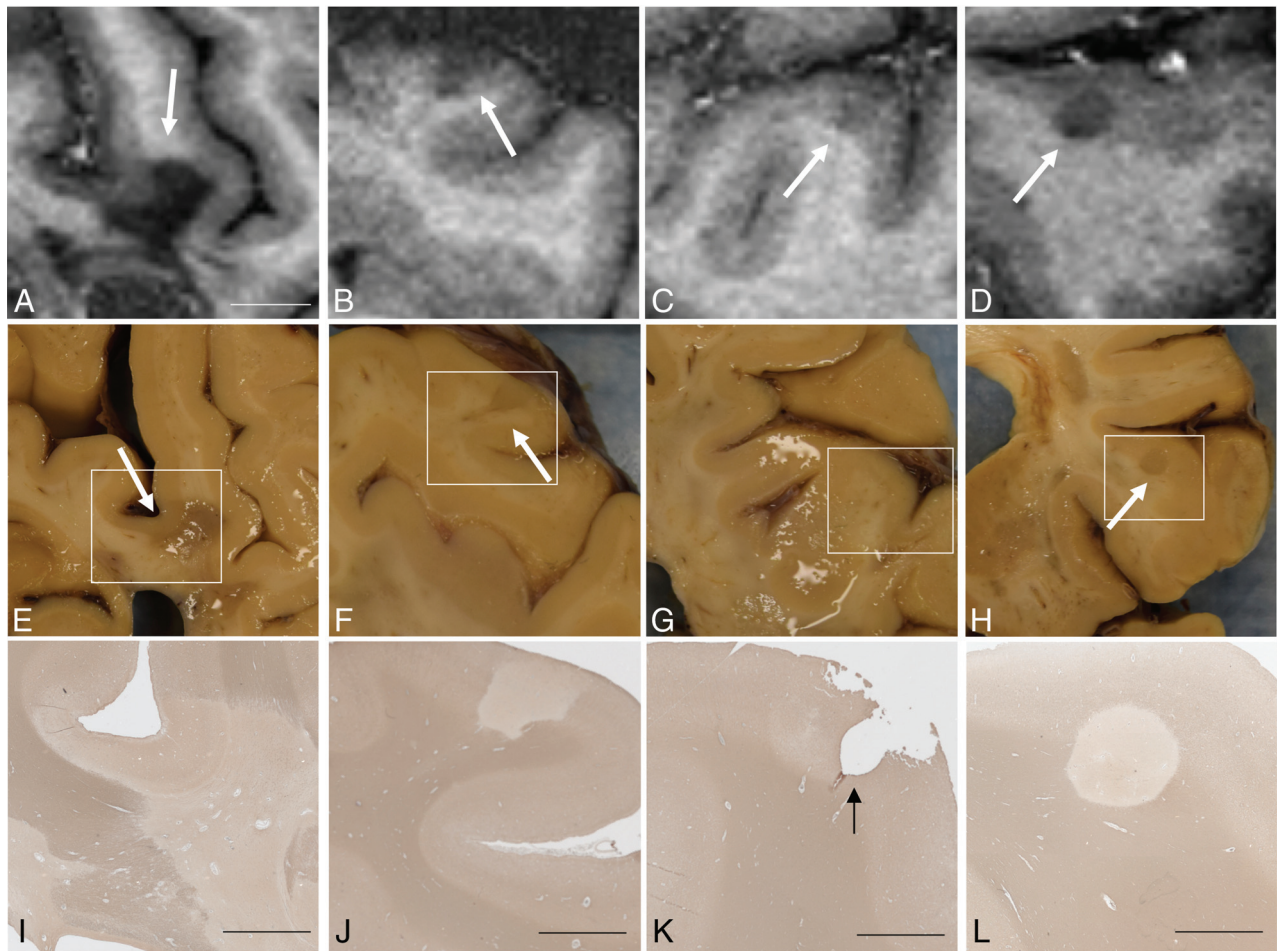

**ON-LINE FIG 4.** Postmortem MR imaging and histopathology. Regions corresponding to the location of 4 lesions (*white arrows*) seen on postmortem MP2RAGE (*A–D*) were identified grossly (*E–H*), and the corresponding tissue was examined for demyelination using an antibody against myelin proteolipid protein (*I–L*, brown). Lesions in *A*, *B*, and *D* are visible grossly and correspond to demyelinated lesions (*I*, *J*, and *L*). The lesion in *C* corresponds to a tear in the cortex (*K*, *black arrow*). Scale bar = 5 mm (*A*), 1 mm (*I–L*).

**On-line Table 1: Cohort characteristics**

|                                        | MS (n = 13) | Healthy Controls (n = 5) |
|----------------------------------------|-------------|--------------------------|
| Age (yr)                               |             |                          |
| Mean                                   | 54          | 57                       |
| SD                                     | 10          | 17                       |
| Sex (No.)                              |             |                          |
| Female                                 | 8           | 2                        |
| Male                                   | 5           | 3                        |
| Years since symptom onset              |             |                          |
| Mean                                   | 24          |                          |
| SD                                     | 11          |                          |
| Clinical subtype (No.) (%)             |             |                          |
| Relapsing-remitting MS                 | 9 (69%)     |                          |
| Secondary-progressive MS               | 3 (23%)     |                          |
| Primary-progressive MS                 | 1 (8%)      |                          |
| Expanded Disability Status Scale score |             |                          |
| Minimum, maximum                       | 1, 7        |                          |
| 25th Percentile, 75th percentile       | 1.5, 3.5    |                          |

**On-line Table 2: MRI acquisition parameters for in vivo 3T sequences**

|                        | In Vivo 3T 3D-MP2RAGE <sup>a</sup> | In Vivo 3T 3D-FLAIR <sup>a</sup> |
|------------------------|------------------------------------|----------------------------------|
| Orientation            | Sagittal                           | Sagittal                         |
| Voxel size (mm)        | 1 mm isotropic                     | 1 mm isotropic                   |
| FOV (mm)               | 240 (AP) × 176 (RL) × 256 (SI)     | 256 (AP) × 176 (RL) × 256 (SI)   |
| TI (ms)                | 700/2500                           | 1800                             |
| TR (ms)                | 5000                               | 4800                             |
| TE (ms)                | 2.96                               | 353                              |
| Flip angle             | 4°/5°                              | 120                              |
| No. of averages        | 1                                  | 1                                |
| Scan time (hr:min:sec) | 0:08:16                            | 0:06:53                          |

**Note:**—AP indicates anterior-posterior axis; RL, right-left axis; SI, superior-inferior axis.

<sup>a</sup>3T images were acquired on average 8 months from the 7T MP2RAGE session. Range, -5 to +30 mo.

**On-line Table 3: MRI acquisition parameters for ex vivo 7T sequences**

|                        | Ex Vivo 7T MP2RAGE              | Ex Vivo 7T 3D-T2*GRE          |
|------------------------|---------------------------------|-------------------------------|
| Orientation            | Coronal                         | Sagittal                      |
| Voxel size (mm)        | 0.4 mm isotropic                | 0.42 mm isotropic             |
| FOV (mm)               | 57.6 (AP) × 179 (RL) × 134 (SI) | 159 (AP) × 37 (RL) × 159 (SI) |
| TI (ms)                | 300/1350                        | NA                            |
| TR (ms)                | 4000                            | 60                            |
| TE (ms)                | 4.49                            | 15.99                         |
| Flip angle             | 4°/5°                           | 10°                           |
| No. of averages        | 1                               | 4                             |
| Scan time (hr:min:sec) | 0:08:47                         | 2:15:42                       |

**Note:**—AP indicates anterior-posterior axis; RL, right-left axis; SI, superior-inferior axis; NA, not applicable.

**On-line Table 4: Comparison of lesions identified on T2\*GRE versus lesions identified on T2\*EPI**

|                                                    | T2*GRE Only  | T2*EPI Only | P Value |
|----------------------------------------------------|--------------|-------------|---------|
| Total cortical lesions (median per patient, range) | 44 (3, 0–15) | 33 (3, 0–7) | .60     |
| Juxtacortical (No.)                                | 11 (25%)     | 7 (21%)     | NA      |
| Leukocortical (No.)                                | 23 (52%)     | 14 (42%)    | NA      |
| Intracortical (No.)                                | 10 (23%)     | 12 (36%)    | NA      |
| Mean lesion volume                                 | 130 ± 425 μL | 70 ± 95 μL  | .43     |

**Note:**—NA, not applicable.

**On-line Table 5: Lesion number and volume by lesion type**

|               | Lesion No. |        |            | Significance      | Mean Lesion Volume | Significance       |
|---------------|------------|--------|------------|-------------------|--------------------|--------------------|
|               | Total      | Median | Range, IQR |                   |                    |                    |
| All lesions   | 309        | 24     | 3–62, 15   |                   | 79 ± 201 μL        |                    |
| Juxtacortical | 60         | 4      | 0–29, 5    |                   | 115 ± 311 μL       |                    |
| Leukocortical | 164        | 14     | 1–30, 12   | * vs JC, ** vs IC | 76 ± 154 μL        | NS vs JC, ** vs IC |
| Intracortical | 85         | 3      | 0–13, 3    | NS vs JC          | 37 ± 36 μL         | *** vs JC          |

**Note:**—JC indicates juxtacortical; IC, intracortical; NS, not significant; asterisk,  $P < .05$ ; double asterisks,  $P < .01$ ; 3 asterisks,  $P < .001$ .
